1 **Whole genome sequencing, *de novo* assembly and phenotypic profiling for the new**  
2 **budding yeast species *Saccharomyces jurei***

3

4 **Samina Naseeb<sup>1#\*</sup>, Haya Alsammar<sup>1#</sup>, Tim Burgis<sup>1</sup>, Ian Donaldson<sup>1</sup>, Norman Knyazev<sup>1</sup>,**  
5 **Christopher Knight<sup>1</sup>, Daniela Delneri<sup>1\*</sup>**

6

7 <sup>1</sup>Manchester Institute of Biotechnology, The University of Manchester, UK, M1 7DN.

8

9 <sup>#</sup>These authors contributed equally in this work

10

11 **Running title: Genomic characterisation of *S. jurei***

12

13 **Key words:** evolution, fitness, PacBio, translocation, *Saccharomyces*

14 **\*Corresponding authors:**

15 Samina Naseeb: samina.naseeb@manchester.ac.uk

16 Daniela Delneri: d.delneri@manchester.ac.uk

17

18

19

20

21

22

23

24

25

26

27 **Abstract**

28 *Saccharomyces sensu stricto* complex consist of yeast species, which are not only important  
29 in the fermentation industry but are also model systems for genomic and ecological analysis.  
30 Here, we present the complete genome assemblies of *Saccharomyces jurei*, a newly  
31 discovered *Saccharomyces sensu stricto* species from high altitude oaks. Phylogenetic and  
32 phenotypic analysis revealed that *S. jurei* is a sister-species to *S. mikatae*, than *S. cerevisiae*,  
33 and *S. paradoxus*. The karyotype of *S. jurei* presents two reciprocal chromosomal  
34 translocations between chromosome VI/VII and I/XIII when compared to *S. cerevisiae*  
35 genome. Interestingly, while the rearrangement I/XIII is unique to *S. jurei*, the other is in  
36 common with *S. mikatae* strain IFO1815, suggesting shared evolutionary history of this  
37 species after the split between *S. cerevisiae* and *S. mikatae*. The number of Ty elements  
38 differed in the new species, with a higher number of Ty elements present in *S. jurei* than in *S.*  
39 *cerevisiae*. Phenotypically, the *S. jurei* strain NCYC 3962 has relatively higher fitness than  
40 the other strain NCYC 3947<sup>T</sup> under most of the environmental stress conditions tested and  
41 showed remarkably increased fitness in higher concentration of acetic acid compared to the  
42 other *sensu stricto* species. Both strains were found to be better adapted to lower  
43 temperatures compared to *S. cerevisiae*.

44

45

46

47

48

49

50

51

52

53

54

## 55 Introduction

56 *Saccharomyces sensu stricto* yeasts, currently comprise eight species: *S. cerevisiae*, *S.*  
57 *paradoxus*, *S. uvarum*, *S. mikatae*, *S. kudriavzevii*, *S. arboricola*, *S. eubayanus*, *S. jurei*  
58 (Libkind et al. 2011; Martini and Martini 1987; Naseeb et al. 2017b; Naumov et al. 1995. a;  
59 Naumov et al. 1995. b; Naumov et al. 2000; Wang and Bai 2008) and two natural hybrids: *S.*  
60 *pastorianus* (Masneuf et al. 1998; Querol and Bond 2009) and *S. bayanus* (Nguyen et al.  
61 2011). *Saccharomyces jurei* is the latest addition to the *sensu stricto* clade and was isolated  
62 from oak tree bark and surrounding soil at an altitude of 1000m above sea level in Saint  
63 Auban, France (Naseeb et al. 2017b). It is known that species within *sensu stricto* group are  
64 reproductively isolated and possess post-zygotic barriers (Naumov 1987). Moreover, yeasts  
65 within this group exhibit almost identical karyotypes with 16 chromosomes (Cardinali and  
66 Martini 1994; Carle and Olson 1985; Naumov et al. 1996).

67 In the modern era of yeast genetics, the advances in sequencing technology has lead to the  
68 whole genome sequencing of many *Saccharomyces sensu stricto* species (*S. cerevisiae*, *S.*  
69 *bayanus* var. *uvarum*, *S. kudriavzevii*, *S. mikatae*, *S. paradoxus*, *S. eubayanus* and *S.*  
70 *arboricola*) (Casaregola et al. 2000; Cliften et al. 2003; Kellis et al. 2003; Libkind et al. 2011;  
71 Liti et al. 2013; Scannell et al. 2011). To date, more than 1000 *S. cerevisiae* strains belonging  
72 to different geographical and environmental origins have been sequenced and assembled  
73 (Engel and Cherry 2013; Peter et al. 2018a). The availability of sequencing data from  
74 multiple strains of hemiascomycets yeast species has enhanced our understanding of  
75 biological mechanisms and comparative genomics. Researchers are now combining  
76 comparative genomics with population ecology to better understand the genetic variations,  
77 taxonomy, evolution and speciation of yeast strains in nature. Genome variation provides the  
78 raw material for evolution, and may arise by various mechanisms including gene duplication,  
79 horizontal gene transfer, hybridization and micro and macro rearrangements (Fischer et al.  
80 2001; Hall et al. 2005; Lynch 2002; Naseeb and Delneri 2012; Naseeb et al. 2016; Naseeb et  
81 al. 2017a; Seoighe et al. 2000). Synteny conservation studies have shown highly variable  
82 rates of genetic rearrangements between individual lineages both in vertebrates and in yeasts  
83 (Bourque et al. 2005; Fischer et al. 2006). This genome variation is a means of evolutionary  
84 adaptation to environmental changes. An understanding of the genetic machinery linked to  
85 phenotypic variation provides knowledge of the distribution of *Saccharomyces* species in  
86 different environments, and their ability to withstand specific conditions (Brice et al. 2018;  
87 Goddard and Greig 2015; Jouhten et al. 2016; Peter et al. 2018b).

88 Recently, we isolated two strains (NCYC 3947<sup>T</sup> and NCYC 3962) of *Saccharomyces jurei*  
89 from *Quercus robur* bark and surrounding soil (Naseeb et al. 2017b). The initial sequencing  
90 of ITS1, D1/D2 and seven other nuclear genes showed that both strains of *S. jurei* were  
91 closely related to *S. mikatae* and *S. paradoxus* and grouped in *Saccharomyces sensu stricto*  
92 complex. We also showed that *S. jurei* can readily hybridize with other *sensu stricto* species  
93 but the resulting hybrids were sterile (Naseeb et al. 2017b). Here, we represent high quality  
94 *de novo* sequence and assembly of both strains (NCYC 3947<sup>T</sup> and NCYC 3962) of *S. jurei*.  
95 The phylogenetic analysis placed *S. jurei* in the *sensu stricto* clade, in a small monophyletic  
96 group with *S. mikatae*. By combining Illumina HiSeq and PacBio data, we were able to  
97 assemble full chromosomes and carry out synteny analysis. Moreover, we show that *S. jurei*  
98 NCYC 3962 had higher fitness compared to NCYC 3947<sup>T</sup> under different environmental  
99 conditions. Fitness of *S. jurei* strains at different temperatures showed that it was able to grow  
100 at wider range of temperatures (12°C-37°C).

## 101 **Material and Methods**

### 102 **Yeast strains**

103 Strains used in this study are presented in Table 1. All strains were grown and maintained on  
104 YPDA (1% w/v yeast extract, 2% w/v Bacto-peptone, 2% v/v glucose and 2% w/v agar).  
105 Species names and strains number are stated in Table 1.

### 106 **DNA Extraction**

107 For Illumina HiSeq, the total DNA was extracted from an overnight grown culture of yeast  
108 strains by using the standard phenol/chloroform method described previously (Fujita and  
109 Hashimoto 2000) with some modifications. Briefly, 5 ml of overnight grown yeast cells were  
110 centrifuged and resuspended in 500 µl EB buffer (4M sorbitol, 500mM EDTA and 1M DTT)  
111 containing 1 mg/ml lyticase. The cells were incubated at 37°C for 1 hour. Following  
112 incubation, the cells were mixed with stop solution (3M NaCl, 100mM Tris pH 7.5 and  
113 20mM EDTA) and 60 µl of 10% SDS. The cell suspension was vortexed and mixed with 500  
114 µl phenol-chloroform. The samples were centrifuged at 13000 rpm for 2 minutes to separate  
115 the aqueous phase from the organic phase. The upper aqueous phase was transferred to a  
116 clean 1.5 ml tube and phenol-chloroform step was repeated twice until a white interface was  
117 no longer present. The aqueous phase was washed with 1 ml absolute ethanol by  
118 centrifugation at 13000 rpm for 10 minutes. The pellet was air dried and resuspended in 30 µl  
119 of sterile milliQ water.

120 Genomic DNA for PacBio sequencing was extracted using Qiagen Genomic-tip 20/G kit (cat.  
121 No. 10223) following manufacturer's recommended instructions. The yield of all DNA  
122 samples was assessed by the nanodrop spectrophotometer (ND-1000) and by Qubit 2.0  
123 fluorometer (catalogue no. Q32866). Purity and integrity of DNA was checked by  
124 electrophoresis on 0.8% (w/v) agarose gel and by calculating the A260/A280 ratios.

### 125 **Library preparation for Illumina and PacBio sequencing**

126 Paired end whole-genome sequencing was performed using the Illumina HiSeq platform.  
127 FastQC (Babraham Bioinformatics) was used to apply quality control to sequence reads,  
128 alignment of the reads was performed using BOWTIE2 (Langmead and Salzberg 2012) and  
129 post-processed using SAMTOOLS (Li et al. 2009).

130 For Pacbio sequencing, genomic DNA (10 µg) of NCYC 3947<sup>T</sup> and NCYC 3962 strains was  
131 first DNA damage repaired, sheared with Covaris G-tube, end repaired and exonuclease  
132 treated. Smrtbell library (10-20kb size) was prepared by ligation of hairpin adaptors at both  
133 ends according to PacBio recommended procedure (Pacific Bioscience, No: 100-259-100).  
134 The resulting library was then size selected using Blue Pippin with 7-10kb cut-  
135 off. Sequencing run was performed on PacBio RS II using P6/C4 chemistry for 4 hours. The  
136 genome was assembled using SMRT analysis and HGAP3 pipeline was made using default  
137 settings.

### 138 **Genome assembly, annotation, orthology and chromosomal structural plots**

139 The PacBio sequences were assembled using hierarchical genome-assembly process (HGAP)  
140 (Chin et al. 2013). Protein coding gene models were predicted using Augustus (Stanke and  
141 Morgenstern 2005) and the Yeast Genome Annotation Pipeline (Byrne and Wolfe 2005). In  
142 addition, protein sequences from other *Saccharomyces* species were aligned to the genome  
143 assembly using tblastn (Gertz et al. 2006). These predictions and alignments were used to  
144 produce a final set of annotated genes with the Apollo annotation tool (Lewis et al. 2002).  
145 The protein sequences were functionally annotated using InterproScan (Jones et al. 2014).  
146 Orthologous relationships with *S. cerevisiae* S288C sequences were calculated using  
147 InParanoid (Berglund et al. 2008). Non-coding RNAs were annotated by searching the  
148 RFAM database (Nawrocki et al. 2015) using Infernal (Nawrocki and Eddy 2013). Further  
149 tRNA predictions were produced using tRNAscan (Lowe and Eddy 1997). Repeat sequences  
150 were identified in Repbase (Bao et al. 2015) using Repeat Masker (Smit et al. 2013-2015).

151 The dotplots were constructed by aligning *S. jurei* genome to the *S. cerevisiae* S288C genome  
152 using NUCmer and plotted using MUMmerplot (Kurtz et al. 2004). These features are  
153 available to browse via a UCSC genome browser (Kent et al. 2002) track hub (Raney et al.  
154 2014). Single nucleotide polymorphisms (SNPs) were identified using Atlas-SNP2(Challis et  
155 al. 2012).

## 156 **Phenotypic assays**

### 157 **Temperature tolerance**

158 Fitness of *S. jurei* strains and *Saccharomyces sensu stricto* type strains was examined using  
159 FLUOstar optima microplate reader at 12°C, 16°C, 20°C, 25°C, 30°C and 37°C. Cells were  
160 grown from a starting optical density (OD) of 0.15 to stationary phase in YPD (1% w/v yeast  
161 extract, 2% w/v Bacto-peptone and 2% w/v glucose) medium. The growth OD<sub>595</sub> was  
162 measured every 5 minutes with 1 minute shaking for 72 hours. Growth parameters, lag phase  
163 ( $\lambda$ ), maximum growth rate ( $\mu_{\max}$ ), and maximum biomass ( $A_{\max}$ ) were estimated using R  
164 shiny app on growth curve analysis ([https://kobchai-](https://kobchai-shinyapps01.shinyapps.io/growth_curve_analysis/)  
165 [shinyapps01.shinyapps.io/growth\\_curve\\_analysis/](https://kobchai-shinyapps01.shinyapps.io/growth_curve_analysis/)).

### 167 **Environmental stress**

168 Strains were screened for tolerance to environmental stressors using a high-throughput spot  
169 assay method. Cells were grown in a 96-well plate containing 100  $\mu$ l YPD in four replicates  
170 at 30°C for 48 hours. The yeast strains grown in 96-well plate were sub-cultured to a 384  
171 well plate to achieve 16 replicates of each strain and grown at 30°C for 48 hours. Singer  
172 ROTOR ©HAD robot (Singer Instruments, UK) was used to spot the strains on (i) YPDA +  
173 0.4% & 0.6% acetic acid, (ii) YPDA+ 4mM & 6mM H<sub>2</sub>O<sub>2</sub>, (iii) YPDA+ 2.5mM & 5mM  
174 CuSO<sub>4</sub>, (iv) YPDA+ 2% & 5% NaCl, (v) YPDA+ 5% & 10% Ethanol (vi) YPA+ 15%  
175 maltose and (vii) YPA+ 30% & 35% glucose. The spot assay plates were incubated at 30°C  
176 and high-resolution images of phenotypic plates were taken using phenobooth after 3 days of  
177 incubation (Singer Instruments, UK). The colony sizes were calculated in pixels using  
178 phenosuite software (Singer Instruments, UK) and the heat maps of the phenotypic behaviors  
179 were constructed using R shiny app ([https://kobchai-](https://kobchai-shinyapps01.shinyapps.io/heatmap_construction/)  
180 [shinyapps01.shinyapps.io/heatmap\\_construction/](https://kobchai-shinyapps01.shinyapps.io/heatmap_construction/)).

181

### 182 **Data and reagent availability**

183 Strains are available upon request. Supplemental files are available at FigShare  
184 (<https://figshare.com/s/60bbbc1e98886077182a>). Figure S1 shows alignment of the amino  
185 acid sequences of *MEL1* gene belonging to *S. jurei* NCYC 3947<sup>T</sup> (Sj) and *S. mikatae* IFO  
186 1816 (Sm). Table S1, Table S2, Table S3 and Table S4 list the genes, which are present in  
187 simple one to one orthologous relationship, in many to many relationship, in many to one  
188 relationship and in one to many relationship, respectively. Table S5 lists the genes that are  
189 present in *S. cerevisiae* but absent in *S. jurei*. Table S6 lists the genes which are present in *S.*  
190 *jurei* but absent in *S. cerevisiae*. Table S7 lists the genes which are used to construct the  
191 phylogenetic tree. Table S8 lists the genes which are potentially introgressed in *S. jurei*  
192 genome from *S. paradoxus*. Table S9, Table S10 and Table S11 show lag phase time ( $\lambda$ ),  
193 maximum growth rate ( $\mu_{max}$ ) and maximum biomass ( $A_{max}$ ) of *Saccharomyces species* used  
194 in this study, respectively.

195

## 196 **Results and Discussion**

197

### 198 **High quality *de novo* sequencing and assembly of *S. jurei* genome**

199 Genome sequencing of the diploid *S. jurei* NCYC 3947<sup>T</sup> and NCYC 3962 yeast strains was  
200 performed using Illumina Hiseq and Pacbio platforms. We obtained approximately  $9.02 \times 10^5$   
201 and  $4.5 \times 10^5$  reads for NCYC 3947<sup>T</sup> and NCYC 3962 respectively. We obtained  $2 \times 101$  bp  
202 reads derived from  $\sim 200$  bp paired-end reads which were assembled in 12 Mb genome  
203 resulting in a total coverage of 250x based on high quality reads. The sequencing results and  
204 assembled contigs are summarized in Tables 2-4. By combining the Illumina mate pair and  
205 Pacbio sequencing we were able to assemble full chromosomes of *S. jurei* NCYC 3947<sup>T</sup> and  
206 NCYC 3962 (Tables 5 and 6). The total genome size ( $\sim 12$  Mb) obtained for both strains of *S.*  
207 *jurei* was comparable to the previously published genomes of *Saccharomyces sensu stricto*  
208 species (Baker et al. 2015; Goffeau et al. 1996; Liti et al. 2013; Scannell et al. 2011).

### 209 ***S. jurei* genome prediction and annotation**

210 The high-quality *de novo* assembly of *S. jurei* NCYC 3947<sup>T</sup> genome resulted in 5,794  
211 predicted protein-coding genes for *S. jurei*, which is similar to the published genomes of  
212 other *sensu stricto* species (Baker et al. 2015; Liti et al. 2009; Liti et al. 2013; Scannell et al.  
213 2011; Walther et al. 2014). Of the predicted protein-coding genes, 5,124 were in a simple 1:1  
214 putatively orthologous relationship between *S. cerevisiae* and *S. jurei* (Table S1). From the

215 remaining protein-coding genes, 35 genes showed many to many relationship (multiple *S.*  
216 *cerevisiae* genes in paralogous cluster with multiple *S. jurei* genes (Table S2), 31 genes were  
217 in many to one relationship (many genes in *S. cerevisiae* are in an paralogous cluster with a  
218 single *S. jurei* gene; most of these were found to be retrotransposons; Table S3) and 50 genes  
219 were in one to many relationships (one *S. cerevisiae* gene in an paralogous cluster with many  
220 *S. jurei* genes; Table S4). Interestingly, we found an increase in the copy number of maltose  
221 metabolism and transport genes (*IMA1*, *IMA5*, *MAL31*, and *YPR196W*- 2 copies of each  
222 gene), flocculation related gene (*FLO1*- 2 copies) and hexose transporter (*HXT8*- 3 copies).  
223 Increased dosage of these genes in *S. jurei* could have conferred selective advantage towards  
224 better sugar utilization (Adamczyk et al. 2016; Lin and Li 2011; Ozcan and Johnston 1999;  
225 Soares 2011). Genes encoding for PAU proteins (a member of the seripauperin multigene  
226 family), copper resistance and salt tolerance related genes were found to be present in fewer  
227 copies in *S. jurei* genome compared to *S. cerevisiae*. This variation in copy number of genes  
228 in a genome can have phenotypic and physiological effects on the species (Adamo et al.  
229 2012; Gorter de Vries et al. 2017; Landry et al. 2006).

230 We also searched for the presence of repetitive elements in *S. jurei* NCYC 3947<sup>T</sup> and NCYC  
231 3962 using BLAST and compared them to the Ty elements in *S. cerevisiae*. We detected  
232 Ty1-LTR, Ty2-LTR, Ty2-I-int, Ty3-LTR, Ty3-I and Ty4 sequences in both strains of *S.*  
233 *jurei*. Interestingly, we found an increased number of TY1-LTR, TY2-LTR, TY3-LTR and  
234 TY4 elements in *S. jurei* genome compared to *S. cerevisiae* (Table 7). Repetitive sequences  
235 are found in genomes of all eukaryotes and can be a potential source of genomic instability  
236 since they can recombine and cause chromosomal rearrangements, such as translocations,  
237 inversions and deletions (Chan and Kolodner 2011; Naseeb et al. 2016; Shibata et al. 2009).

### 238 ***Saccharomyces jurei* share a chromosomal translocation with *Saccharomyces mikatae*** 239 **IFO 1815**

240 To check the presence or absence of genomic rearrangements in *S. jurei*, we compared the  
241 chromosome structures between *S. jurei* NCYC 3947<sup>T</sup> and *S. jurei* NCYC 3962 (Figure 1A),  
242 between *S. cerevisiae* S288C and *S. mikatae* IFO1815 (Figure 1B), between *S. jurei* NCYC  
243 3947<sup>T</sup> and *S. cerevisiae* S288C (Figure 2A) and between *S. jurei* NCYC 3947<sup>T</sup> and *S. mikatae*  
244 IFO1815 (Figure 2B). The two *S. jurei* strains had a syntenic genome (Figure 1A), while we  
245 identified two chromosomal translocations with *S. cerevisiae* S288C (Figure 2A). One  
246 translocation is unique to *S. jurei* and is located between chromosomes I and XIII (Figure 2,



247 red ovals), while the second translocation is located between chromosomes VI and VII in the  
248 same position of the previously identified translocation in *S. mikatae* IFO1815 (Figure 2,  
249 black ovals).

250 The breakpoints of the translocation I/XIII and are in the intergenic regions between  
251 uncharacterized genes. The breakpoints neighborhood is surrounded by several Ty elements  
252 (Ty1-LTR, Ty4, and Ty2-LTR) and one tRNA, which may have caused the rearrangement  
253 (Bridier-Nahmias et al. 2015; Fischer et al. 2000; Liti et al. 2013; Mieczkowski et al. 2006).  
254 The translocation in common with *S. mikatae* shares the same breakpoints between open  
255 reading frames (ORFs) YFR006w and YFR009w on chromosome VI, and between ORFs  
256 YGR021w and YGR026w on chromosome VII. This translocation is also shared by both  
257 strains of *S. mikatae*, but not with other *Saccharomyces sensu stricto* species. Overall this  
258 suggests a common evolutionary history between these stains and species, however an  
259 adaptive value of this rearrangement or a case of breakpoint re-usage cannot be ruled out  
260 since rearrangements can be adaptive with evidence both from nature and lab setting. (Adams  
261 et al. 1992; Avelar et al. 2013; Chang et al. 2013; Colson et al. 2004; Dunham et al. 2002;  
262 Fraser et al. 2005; Hewitt et al. 2014). Several natural isolates of *S. cerevisiae* present  
263 karyotypic changes (Hou et al. 2014) and the reciprocal translocation present between  
264 chromosomes VIII and XVI is able to confer sulphite resistance to the yeasts strains in  
265 vineyards (Perez-Ortin et al. 2002). Furthermore, lab experimental evolution studies in  
266 different strains of *S. cerevisiae* when evolved under similar condition end up sharing the  
267 same breakpoints (Dunham et al. 2002). Previous studies on mammalian systems have shown  
268 that breakpoints maybe reused throughout evolution at variable rates (Larkin et al. 2009;  
269 Murphy et al. 2005), and breakpoint re-usage has also been found between different strains of  
270 *S. pastorianus* (Hewitt et al. 2014).

### 271 **Novel genes present in *S. jurei***

272 The comparison between *S. jurei* and *S. cerevisiae* genome showed 622 differentially present  
273 genes. 179 open reading frames (ORFs) were predicted to be novel in *S. jurei* when compared  
274 to *S. cerevisiae* reference S288C strain (Table S5). To further confirm if these ORFs were  
275 truly novel, we analyzed the sequences in NCBI nucleotide database and in *Saccharomyces*  
276 Genome Database (SGD) against all the fungal species. We found 4 novel ORFs that have no  
277 significant match to any of the available genomes (Table S5-shown in red). 5 ORFs gave  
278 partial similarity to different fungal species such as *Vanderwaltozyma polyspora*,

279 *Kluyveromyces marxianus*, *Torulaspota delbrueckii*, *Zygosaccharomyces rouxii*,  
280 *Hyphopichia burtonii*, *Kazachstania africana*, *Trichocera brevicornis*, *Lachancea walti*, and  
281 *Naumovozyma castellii* (Table S5-yellow highlighted). Majority of the remaining sequences  
282 gave full or partial matches to *S. cerevisiae* natural isolates (Strope et al. 2015), *S. paradoxus*,  
283 *S. mikatae*, *S. kudriavzevii*, *S. bayanus*, *S. uvarum*, and *S. eubayanus*.

284 Moreover, we also found 462 ORFs, which are present in *S. cerevisiae* genome but were lost  
285 in *S. jurei* (Table S6). The majority of genes which were novel or lost in *S. jurei* were found  
286 to be subtelomeric or telomeric, in regions known to show higher genetic variations  
287 (Bergstrom et al. 2014).

288 The genes lost in *S. jurei* encompass functionally verified ORFs, putative genes and  
289 uncharacterized genes. Some of the verified ORFs included ribosomal subunits genes,  
290 asparagine catabolism genes, alcohol dehydrogenase genes, hexose transporters, genes  
291 involved in providing resistance to arsenic compounds, phosphopyruvate hydratase genes,  
292 iron transport facilitators, ferric reductase genes and flocculation related genes.

293 We found that *S. jurei* genome lacks four out of seven alcohol dehydrogenase (AAD) genes  
294 including the functional *AAD4* gene, which is involved in oxidative stress response (Delneri  
295 et al. 1999a; Delneri et al. 1999b). Although *S. jurei* has lost *AAD4* gene, however, it was  
296 able to tolerate oxidative stress caused by 4mM H<sub>2</sub>O<sub>2</sub> (Figure 3A).

297 All four genes of the *ASP3* gene cluster located on chromosome XII are absent in *S. jurei*. It  
298 was not surprising since this gene cluster is only known to be present in *S. cerevisiae* strains  
299 isolated from industrial and laboratory environments and lost from 128 diverse fungal species  
300 (Gordon et al. 2009; League et al. 2012). These genes are up-regulated during nitrogen  
301 starvation allowing the cells to grow by utilizing extracellular asparagine as a nitrogen  
302 source.

303 The hexose transporter family consists of 20 putative HXT genes (*HXT1-HXT17*, *GAL2*,  
304 *SNF3*, and *RGT2*) located on different chromosomes (Boles and Hollenberg 1997;  
305 Kruckeberg 1996) of which *HXT15*, *HXT16* and *HXT2* are absent from *S. jurei*. Under  
306 normal conditions, only 6 HXT genes (*HXT1* and *HXT3-HXT7*) are known to play role in  
307 glucose uptake suggesting that loss of 3 HXT genes from *S. jurei* is unlikely to affect glucose  
308 transport (Lin and Li 2011).

309 **Heterozygosis and strain divergence in the *S. jurei***

310 To detect genetic divergence between the two strains we mapped SNPs between the strains  
311 (NCYC 3947<sup>T</sup> vs NCYC 3962), while to detect heterozygosity, we mapped the Single  
312 Nucleotide Polymorphisms (SNPs) in the two sets of alleles within the novel strains (NCYC  
313 3947<sup>T</sup> vs NCYC 3947<sup>T</sup>, and NCYC 3962 vs NCYC 3962). We found 6227 SNPs between the  
314 two strains, showing a genetic divergence between them. Moreover, 278 and 245 SNPs were  
315 found within NCYC 3947<sup>T</sup> and NCYC 3962 strains respectively, indicating a low level of  
316 heterozygosity within each strain (Table 8). 139 SNPs were found to be common to both  
317 strains. Previous studies on *S. cerevisiae* and *S. paradoxus* strains from different lineages  
318 have shown that the level of heterozygosity is variable, with a large number of strains  
319 showing high level of heterozygosity isolated from human associated environments  
320 (Magwene et al. 2011; Tsai et al. 2008). A more recent study on 1011 *S. cerevisiae* natural  
321 strains showed that 63% of the sequenced isolates were heterozygous (Peter et al. 2018a).

### 322 **Phylogenetic analysis**

323 A first phylogeny construction using ITS/D1+D2 sequence analysis showed that *S. jurei* is  
324 placed in the tree close to *S. cerevisiae*, *S. mikatae* and *S. paradoxus* (Naseeb et al. 2017b).  
325 Here, we reconstructed the phylogeny using a multigene concatenation approach, which  
326 combines many genes together giving a large alignment (Baldauf et al. 2000; Brown et al.  
327 2001; Fitzpatrick et al. 2006). Combination of concatenated genes improves the phylogenetic  
328 accuracy and helps to resolve the nodes and basal branching (Rokas et al. 2003). To  
329 reconstruct the evolutionary events, we concatenated 101 universally distributed orthologs  
330 obtained from complete genome sequencing data (Table S7). Both novel strains were located  
331 in one single monophyletic group, with the *S. mikatae* (Figure 4). Since *S. jurei* also have a  
332 chromosomal translocation in common with *S. mikatae*, it further shows that the two species  
333 share similar evolutionary history and hence present in the same group on the phylogenetic  
334 tree.

### 335 **Introgression analysis**

336 To determine whether the two *S. jurei* strains possessed any introgressed region from other  
337 yeast species, we compared *S. jurei* genome with those of *S. cerevisiae*, *S. mikatae*, *S.*  
338 *paradoxus* and *S. kudriavzevii*. We did not observe introgression of any full-length genes or  
339 large segments of the genome (>1000 bp) in *S. jurei*. However, in both novel strains, we  
340 identified seven small DNA fragments (300 bp-700 bp) belonging to five different genes,  
341 which may have derived from *S. paradoxus* or *S. mikatae* (Table S8). DNA fragments from

342 all the genes (*CSS3*, *IMA5*, *MAL33*, *YAL003W*) with the exception of *YDR541C*, showed a  
343 high sequence similarity to *S. paradoxus* genome, indicating putative introgression from *S.*  
344 *paradoxus* to *S. jurei* (Table S8).

345 Introgression of genetic material can easily occur in *Saccharomyces* species by crossing the  
346 isolates to make intraspecific or interspecific hybrids (Fischer et al. 2000; Naumov et al.  
347 2000). Among the *Saccharomyces sensu stricto* group, introgressions have been  
348 demonstrated in natural and clinical yeast isolates (Liti et al. 2006; Muller and McCusker  
349 2009; Wei et al. 2007; Zhang et al. 2010) and in wine, beer and other fermentation  
350 environments (de Barros Lopes et al. 2002; Dunn et al. 2012; Usher and Bond 2009). It is  
351 generally believed that introgressed regions are retained, as they may be evolutionarily  
352 advantageous (Strope et al. 2015; Novo et al. 2009). Previous studies have demonstrated that  
353 introgression in *S. cerevisiae* is relatively common and a majority of the genes are derived  
354 from introgression with *S. paradoxus* (Liti et al. 2006; Novo et al. 2009; Peter et al. 2018a;  
355 Strope et al. 2015; Warringer et al. 2011).

### 356 **Phenotypic profiling of *S. jurei***

357 We performed large-scale phenotypic profiling under various stress conditions and at  
358 different temperatures to capture the fitness landscape of *S. jurei* (strains NCYC 3947<sup>T</sup> and  
359 NCYC 3962) relative to other *Saccharomyces sensu stricto* species. Colony size was taken as  
360 a proxy for fitness score (see methods). Generally the fitness of *S. jurei* NCYC 3962 in  
361 different environmental stressor conditions was higher compared to *S. jurei* NCYC 3947<sup>T</sup>  
362 (Figure 3). Remarkably, only *S. jurei* NCYC 3962 was able to grow well on higher  
363 concentrations of acetic acid (Figure 3). Like most of the other *Saccharomyces* yeast species,  
364 both strains of *S. jurei* can also grow in media containing 10% ethanol. Although *S.*  
365 *eubayanus* showed the highest fitness in media containing 15% maltose, both strains of *S.*  
366 *jurei* were also able to tolerate high concentrations of maltose. Moreover, *S. jurei* NCYC  
367 3962 was able to better tolerate higher concentrations of H<sub>2</sub>O<sub>2</sub>, CuSO<sub>4</sub> and NaCl compared to  
368 most of the other *sensu stricto* species (Figure 3). *Saccharomyces* yeast species can acquire  
369 copper tolerance either due to an increase in *CUP1* copy number (Warringer et al. 2011) or  
370 due to the use of copper sulfate as a fungicide in vineyards (Fay et al. 2004; Perez-Ortin et al.  
371 2002). The genomic analysis shows that both strains of *S. jurei* possess one copy of *CUP1*,  
372 indicating other factors maybe associated with copper tolerance.

373 Phenotypically, both strains of *S. jurei* clustered with *S. mikatae* and *S. paradoxus*, which is  
374 in accordance with our phylogenetic results, and, interestingly, the brewing yeast *S.*  
375 *eubayanus* was also present in the same cluster (Figure 3). This may indicate that in spite of  
376 the phylogenetic distance, *S. eubayanus* may have shared similar ecological conditions with  
377 the other above mentioned species.

378 We also evaluated the fitness of *S. jurei* strains in comparison to *Saccharomyces sensu stricto*  
379 species at different temperatures, taking into account growth parameters such as lag phase  
380 ( $\lambda$ ), maximum growth rate ( $\mu_{\max}$ ), and maximum biomass ( $A_{\max}$ ) (Tables S9-S11). The  
381 optimum growth of NCYC 3947<sup>T</sup> and NCYC 3962 was at 25°C and 30°C respectively (Table  
382 S10). Both strains of *S. jurei* are able to grow at a high temperatures (i.e. 37°C) compared to  
383 *S. kudriavzevii*, *S. pastorianus*, *S. arboricola*, *S. uvarum*, and *S. eubayanus*, which are unable  
384 to grow at 37°C (Table S10). The ability of *S. jurei* strains to grow well both at cold and  
385 warm suggest that this species evolved to be a generalist rather than a specialist in terms of  
386 thermoprofiles. The growth profiles captured at different temperatures for the other  
387 *Saccharomyces* species was in accordance to the previously published study (Salvado et al.  
388 2011).

## 389 **Conclusions**

390 High quality *de novo* assembly of two novel strains of *S. jurei* (NCYC 3947<sup>T</sup> and NCYC  
391 3962) has been carried out using short and long reads sequencing strategies. We obtained a  
392 12Mb genome and were able to assemble full chromosomes of both species. We found two  
393 reciprocal chromosomal translocations in *S. jurei* genome, between chromosomes I/XIII and  
394 VI/VII. The translocation between chromosomes I/XIII is unique to *S. jurei* genome, whereas  
395 the translocation between VI/VII is shared with *S. mikatae* IFO1815 and IFO1816. This  
396 suggests a common origin between *S. jurei* and *S. mikatae* and *S. jurei* evolved after  
397 acquiring the translocation between chromosomes I/XIII, while *S. mikatae* 1815 acquired a  
398 second translocation between chromosomes XVI/VII. Moreover, both strains of *S. jurei*  
399 showed low heterozygosity within themselves and were genetically diverged possessing 6227  
400 SNPs between them. We found 4 novel ORFs that had no significant match to any of the  
401 available genomes. *S. jurei* genome had an increased number of TY elements compared to *S.*  
402 *cerevisiae* and showed no signatures of introgression. The phylogenetic analysis showed that  
403 the novel species is closely related to *S. mikatae*, forming a single monophyletic group.

404 Phenotypically, the environmental stressor profiles of *S. jurei* are similar to those of with *S.*  
405 *mikatae*, *S. paradoxus*, *S. cerevisiae* (which further reiterate that *S. jurei* is closely related to  
406 these species) and *S. eubayanus*. We found that *S. jurei* NCYC 3962 compared to other  
407 *sensu stricto* species was able to grow well at high concentrations of acetic acid. In general,  
408 *S. jurei* NCYC 3962 showed relatively higher fitness compared to *S. jurei* NCYC 3947<sup>T</sup>  
409 under most of the environmental stress conditions tested. Both strains of *S. jurei* showed  
410 similar growth rate at relatively low temperature, however, NCYC 3962 showed increased  
411 fitness compared to NCYC 3947<sup>T</sup> at higher temperatures. The sequencing data and the large-  
412 scale phenotypic screening of this new species provide the basis for future investigations of  
413 biotechnological and industrial importance.

#### 414 **Data accessibility**

415 The sequences and annotations reported in this paper are available in the European  
416 Nucleotide Archive under project ID PRJEB24816, assembly ID GCA\_900290405 and  
417 accession number ERZ491603.

#### 418 **Competing interests**

419 The authors declare no competing interests.

#### 420 **Acknowledgements**

421 The authors would like to thank Genomic Technologies Core Facility at the University of  
422 Manchester for Illumina Hi-seq and Dr. Haiping Hao at Deep Sequencing and Microarray  
423 Core Facility of Johns Hopkins University for PacBio sequencing. SN is supported through  
424 BBSRC funding (BB/L021471/1). HA is supported by a scholarship funded by the Kuwait  
425 government through Kuwait University.

#### 426 **References**

- 427 Adamczyk, J., et al. (2016), 'Copy number variations of genes involved in stress responses  
428 reflect the redox state and DNA damage in brewing yeasts', *Cell Stress Chaperones*,  
429 21 (5), 849-64.
- 430 Adamo, G. M., et al. (2012), 'Amplification of the CUP1 gene is associated with evolution of  
431 copper tolerance in *Saccharomyces cerevisiae*', *Microbiology*, 158 (Pt 9), 2325-35.
- 432 Adams, J., et al. (1992), 'Adaptation and major chromosomal changes in populations of  
433 *Saccharomyces cerevisiae*', *Curr Genet*, 22 (1), 13-9.
- 434 Avelar, A. T., et al. (2013), 'Genome architecture is a selectable trait that can be maintained  
435 by antagonistic pleiotropy', *Nat Commun*, 4, 2235.

- 436 Baker, E., et al. (2015), 'The Genome Sequence of *Saccharomyces eubayanus* and the  
437 Domestication of Lager-Brewing Yeasts', *Mol Biol Evol*, 32 (11), 2818-31.
- 438 Baldauf, S. L., et al. (2000), 'A kingdom-level phylogeny of eukaryotes based on combined  
439 protein data', *Science*, 290 (5493), 972-7.
- 440 Bao, W., Kojima, K. K., and Kohany, O. (2015), 'Repbase Update, a database of repetitive  
441 elements in eukaryotic genomes', *Mob DNA*, 6, 11.
- 442 Berglund, A. C., et al. (2008), 'InParanoid 6: eukaryotic ortholog clusters with inparalogs',  
443 *Nucleic Acids Res*, 36 (Database issue), D263-6.
- 444 Bergstrom, A., et al. (2014), 'A high-definition view of functional genetic variation from  
445 natural yeast genomes', *Mol Biol Evol*, 31 (4), 872-88.
- 446 Boles, E. and Hollenberg, C. P. (1997), 'The molecular genetics of hexose transport in yeasts',  
447 *FEMS Microbiol Rev*, 21 (1), 85-111.
- 448 Bourque, G., et al. (2005), 'Comparative architectures of mammalian and chicken genomes  
449 reveal highly variable rates of genomic rearrangements across different lineages',  
450 *Genome Res*, 15 (1), 98-110.
- 451 Brice, C., et al. (2018), 'Adaptability of the *Saccharomyces cerevisiae* yeasts to wine  
452 fermentation conditions relies on their strong ability to consume nitrogen', *PLoS One*,  
453 13 (2), e0192383.
- 454 Bridier-Nahmias, A., et al. (2015), 'Retrotransposons. An RNA polymerase III subunit  
455 determines sites of retrotransposon integration', *Science*, 348 (6234), 585-8.
- 456 Brown, J. R., et al. (2001), 'Universal trees based on large combined protein sequence data  
457 sets', *Nat Genet*, 28 (3), 281-5.
- 458 Byrne, K. P. and Wolfe, K. H. (2005), 'The Yeast Gene Order Browser: combining curated  
459 homology and syntenic context reveals gene fate in polyploid species', *Genome Res*,  
460 15 (10), 1456-61.
- 461 Cardinali, G. and Martini, A. (1994), 'Electrophoretic karyotypes of authentic strains of the  
462 sensu stricto group of the genus *Saccharomyces*', *Int J Syst Bacteriol*, 44 (4), 791-7.
- 463 Carle, G. F. and Olson, M. V. (1985), 'An electrophoretic karyotype for yeast', *Proc Natl  
464 Acad Sci U S A*, 82 (11), 3756-60.
- 465 Casaregola, S., et al. (2000), 'Genomic exploration of the hemiascomycetous yeasts: 17.  
466 *Yarrowia lipolytica*', *FEBS Lett*, 487 (1), 95-100.
- 467 Challis, D., et al. (2012), 'An integrative variant analysis suite for whole exome next-  
468 generation sequencing data', *BMC Bioinformatics*, 13, 8.
- 469 Chan, J. E. and Kolodner, R. D. (2011), 'A genetic and structural study of genome  
470 rearrangements mediated by high copy repeat Ty1 elements', *PLoS Genet*, 7 (5),  
471 e1002089.
- 472 Chang, S. L., et al. (2013), 'Dynamic large-scale chromosomal rearrangements fuel rapid  
473 adaptation in yeast populations', *PLoS Genet*, 9 (1), e1003232.
- 474 Chin, C. S., et al. (2013), 'Nonhybrid, finished microbial genome assemblies from long-read  
475 SMRT sequencing data', *Nat Methods*, 10 (6), 563-9.
- 476 Cliften, P., et al. (2003), 'Finding functional features in *Saccharomyces* genomes by  
477 phylogenetic footprinting', *Science*, 301 (5629), 71-6.
- 478 Colson, I., Delneri, D., and Oliver, S. G. (2004), 'Effects of reciprocal chromosomal  
479 translocations on the fitness of *Saccharomyces cerevisiae*', *EMBO Rep*, 5 (4), 392-8.
- 480 de Barros Lopes, M., et al. (2002), 'Evidence for multiple interspecific hybridization in  
481 *Saccharomyces sensu stricto* species', *FEMS Yeast Res*, 1 (4), 323-31.
- 482 Delneri, D., Gardner, D. C., and Oliver, S. G. (1999a), 'Analysis of the seven-member AAD  
483 gene set demonstrates that genetic redundancy in yeast may be more apparent than  
484 real', *Genetics*, 153 (4), 1591-600.

- 485 Delneri, D., et al. (1999b), 'Disruption of seven hypothetical aryl alcohol dehydrogenase  
486 genes from *Saccharomyces cerevisiae* and construction of a multiple knock-out  
487 strain', *Yeast*, 15 (15), 1681-9.
- 488 Dunham, M. J., et al. (2002), 'Characteristic genome rearrangements in experimental  
489 evolution of *Saccharomyces cerevisiae*', *Proc Natl Acad Sci U S A*, 99 (25), 16144-9.
- 490 Dunn, B., et al. (2012), 'Analysis of the *Saccharomyces cerevisiae* pan-genome reveals a pool  
491 of copy number variants distributed in diverse yeast strains from differing industrial  
492 environments', *Genome Res*, 22 (5), 908-24.
- 493 Engel, S. R. and Cherry, J. M. (2013), 'The new modern era of yeast genomics: community  
494 sequencing and the resulting annotation of multiple *Saccharomyces cerevisiae* strains  
495 at the *Saccharomyces* Genome Database', *Database-the Journal of Biological  
496 Databases and Curation*.
- 497 Fay, J. C., et al. (2004), 'Population genetic variation in gene expression is associated with  
498 phenotypic variation in *Saccharomyces cerevisiae*', *Genome Biol*, 5 (4), R26.
- 499 Fischer, G., et al. (2000), 'Chromosomal evolution in *Saccharomyces*', *Nature*, 405 (6785),  
500 451-4.
- 501 Fischer, G., et al. (2001), 'Evolution of gene order in the genomes of two related yeast  
502 species', *Genome Res*, 11 (12), 2009-19.
- 503 Fischer, G., et al. (2006), 'Highly variable rates of genome rearrangements between  
504 hemiascomycetous yeast lineages', *PLoS Genet*, 2 (3), e32.
- 505 Fitzpatrick, D. A., et al. (2006), 'A fungal phylogeny based on 42 complete genomes derived  
506 from supertree and combined gene analysis', *BMC Evol Biol*, 6, 99.
- 507 Fraser, J. A., et al. (2005), 'Chromosomal translocation and segmental duplication in  
508 *Cryptococcus neoformans*', *Eukaryot Cell*, 4 (2), 401-6.
- 509 Fujita, S. and Hashimoto, T. (2000), 'DNA fingerprinting patterns of *Candida* species using  
510 *HinfI* endonuclease', *Int J Syst Evol Microbiol*, 50 Pt 3, 1381-9.
- 511 Gertz, E. M., et al. (2006), 'Composition-based statistics and translated nucleotide searches:  
512 improving the TBLASTN module of BLAST', *BMC Biol*, 4, 41.
- 513 Goddard, M. R. and Greig, D. (2015), '*Saccharomyces cerevisiae*: a nomadic yeast with no  
514 niche?', *FEMS Yeast Res*, 15 (3).
- 515 Goffeau, A., et al. (1996), 'Life with 6000 genes', *Science*, 274 (5287), 546, 63-7.
- 516 Gordon, J. L., Byrne, K. P., and Wolfe, K. H. (2009), 'Additions, losses, and rearrangements  
517 on the evolutionary route from a reconstructed ancestor to the modern *Saccharomyces  
518 cerevisiae* genome', *PLoS Genet*, 5 (5), e1000485.
- 519 Gorter de Vries, A. R., Pronk, J. T., and Daran, J. G. (2017), 'Industrial Relevance of  
520 Chromosomal Copy Number Variation in *Saccharomyces* Yeasts', *Appl Environ  
521 Microbiol*, 83 (11).
- 522 Hall, C., Brachat, S., and Dietrich, F. S. (2005), 'Contribution of horizontal gene transfer to  
523 the evolution of *Saccharomyces cerevisiae*', *Eukaryot Cell*, 4 (6), 1102-15.
- 524 Hewitt, S. K., et al. (2014), 'Sequencing and characterisation of rearrangements in three *S.  
525 pastorianus* strains reveals the presence of chimeric genes and gives evidence of  
526 breakpoint reuse', *PLoS One*, 9 (3), e92203.
- 527 Hou, J., et al. (2014), 'Chromosomal rearrangements as a major mechanism in the onset of  
528 reproductive isolation in *Saccharomyces cerevisiae*', *Curr Biol*, 24 (10), 1153-9.
- 529 Jones, P., et al. (2014), 'InterProScan 5: genome-scale protein function classification',  
530 *Bioinformatics*, 30 (9), 1236-40.
- 531 Jouhten, P., et al. (2016), '*Saccharomyces cerevisiae* metabolism in ecological context',  
532 *FEMS Yeast Res*, 16 (7).
- 533 Kellis, M., et al. (2003), 'Sequencing and comparison of yeast species to identify genes and  
534 regulatory elements', *Nature*, 423 (6937), 241-54.



- 535 Kent, W. J., et al. (2002), 'The human genome browser at UCSC', *Genome Res*, 12 (6), 996-  
536 1006.
- 537 Kruckeberg, A. L. (1996), 'The hexose transporter family of *Saccharomyces cerevisiae*', *Arch*  
538 *Microbiol*, 166 (5), 283-92.
- 539 Kurtz, S., et al. (2004), 'Versatile and open software for comparing large genomes', *Genome*  
540 *Biol*, 5 (2), R12.
- 541 Landry, C. R., et al. (2006), 'Genome-wide scan reveals that genetic variation for  
542 transcriptional plasticity in yeast is biased towards multi-copy and dispensable genes',  
543 *Gene*, 366 (2), 343-51.
- 544 Langmead, B. and Salzberg, S. L. (2012), 'Fast gapped-read alignment with Bowtie 2', *Nat*  
545 *Methods*, 9 (4), 357-9.
- 546 Larkin, D. M., et al. (2009), 'Breakpoint regions and homologous synteny blocks in  
547 chromosomes have different evolutionary histories', *Genome Res*, 19 (5), 770-7.
- 548 League, G. P., Slot, J. C., and Rokas, A. (2012), 'The ASP3 locus in *Saccharomyces*  
549 *cerevisiae* originated by horizontal gene transfer from *Wickerhamomyces*', *FEMS*  
550 *Yeast Res*, 12 (7), 859-63.
- 551 Lewis, S. E., et al. (2002), 'Apollo: a sequence annotation editor', *Genome Biol*, 3 (12),  
552 RESEARCH0082.
- 553 Li, H., et al. (2009), 'The Sequence Alignment/Map format and SAMtools', *Bioinformatics*,  
554 25 (16), 2078-9.
- 555 Libkind, D., et al. (2011), 'Microbe domestication and the identification of the wild genetic  
556 stock of lager-brewing yeast', *Proc Natl Acad Sci U S A*, 108 (35), 14539-44.
- 557 Lin, Z. and Li, W. H. (2011), 'Expansion of hexose transporter genes was associated with the  
558 evolution of aerobic fermentation in yeasts', *Mol Biol Evol*, 28 (1), 131-42.
- 559 Liti, G., Barton, D. B., and Louis, E. J. (2006), 'Sequence diversity, reproductive isolation  
560 and species concepts in *Saccharomyces*', *Genetics*, 174 (2), 839-50.
- 561 Liti, G., et al. (2013), 'High quality de novo sequencing and assembly of the *Saccharomyces*  
562 *arboricolus* genome', *BMC Genomics*, 14, 69.
- 563 Liti, G., et al. (2009), 'Population genomics of domestic and wild yeasts', *Nature*, 458 (7236),  
564 337-41.
- 565 Lowe, T. M. and Eddy, S. R. (1997), 'tRNAscan-SE: a program for improved detection of  
566 transfer RNA genes in genomic sequence', *Nucleic Acids Res*, 25 (5), 955-64.
- 567 Lynch, M. (2002), 'Genomics. Gene duplication and evolution', *Science*, 297 (5583), 945-7.
- 568 Magwene, P. M., et al. (2011), 'Outcrossing, mitotic recombination, and life-history trade-  
569 offs shape genome evolution in *Saccharomyces cerevisiae*', *Proc Natl Acad Sci U S A*,  
570 108 (5), 1987-92.
- 571 Martini, A. V. and Martini, A. (1987), 'Three newly delimited species of *Saccharomyces*  
572 *sensu stricto*', *Antonie Van Leeuwenhoek*, 53 (2), 77-84.
- 573 Masneuf, I., et al. (1998), 'New hybrids between *Saccharomyces sensu stricto* yeast species  
574 found among wine and cider production strains', *Appl Environ Microbiol*, 64 (10),  
575 3887-92.
- 576 Mieczkowski, P. A., Lemoine, F. J., and Petes, T. D. (2006), 'Recombination between  
577 retrotransposons as a source of chromosome rearrangements in the yeast  
578 *Saccharomyces cerevisiae*', *DNA Repair (Amst)*, 5 (9-10), 1010-20.
- 579 Muller, L. A. and McCusker, J. H. (2009), 'A multispecies-based taxonomic microarray  
580 reveals interspecies hybridization and introgression in *Saccharomyces cerevisiae*',  
581 *FEMS Yeast Res*, 9 (1), 143-52.
- 582 Murphy, W. J., et al. (2005), 'Dynamics of mammalian chromosome evolution inferred from  
583 multispecies comparative maps', *Science*, 309 (5734), 613-7.

- 584 Naseeb, S. and Delneri, D. (2012), 'Impact of chromosomal inversions on the yeast DAL  
585 cluster', *PLoS One*, 7 (8), e42022.
- 586 Naseeb, S., et al. (2017a), 'Rapid functional and evolutionary changes follow gene  
587 duplication in yeast', *Proc Biol Sci*, 284 (1861).
- 588 Naseeb, S., et al. (2016), 'Widespread Impact of Chromosomal Inversions on Gene  
589 Expression Uncovers Robustness via Phenotypic Buffering', *Mol Biol Evol*, 33 (7),  
590 1679-96.
- 591 Naseeb, S., et al. (2017b), 'Saccharomyces jurei sp. nov., isolation and genetic identification  
592 of a novel yeast species from Quercus robur', *Int J Syst Evol Microbiol*, 67 (6), 2046-  
593 52.
- 594 Naumov, G. I. (1987), 'Genetic basis for classification and identification of the ascomycetous  
595 yeasts.', *Stud. Mycol*, 30, 469-75.
- 596 Naumov, G. I., Naumova, E. S., and Louis, E. J. (1995. b), ' Two new genetically isolated  
597 populations of the Saccharomyces sensu stricto complex from Japan.', *J. Gen. App.  
598 Microbiol*, 41, 499-505.
- 599 Naumov, G. I., Naumova, E. S., and Sancho, E. D. (1996), 'Genetic reidentification of  
600 Saccharomyces strains associated with black knot disease of trees in Ontario and  
601 Drosophila species in California', *Can J Microbiol*, 42, 335-39.
- 602 Naumov, G. I., et al. (1995. a), 'A new genetically isolated population of the Saccharomyces  
603 sensu stricto complex from Brazil', *Antonie Van Leeuwenhoek*, 67 (4), 351-5.
- 604 Naumov, G. I., et al. (2000), 'Three new species in the Saccharomyces sensu stricto complex:  
605 Saccharomyces cariocanus, Saccharomyces kudriavzevii and Saccharomyces  
606 mikatae', *Int J Syst Evol Microbiol*, 50 Pt 5, 1931-42.
- 607 Nawrocki, E. P. and Eddy, S. R. (2013), 'Infernal 1.1: 100-fold faster RNA homology  
608 searches', *Bioinformatics*, 29 (22), 2933-5.
- 609 Nawrocki, E. P., et al. (2015), 'Rfam 12.0: updates to the RNA families database', *Nucleic  
610 Acids Res*, 43 (Database issue), D130-7.
- 611 Nguyen, H. V., et al. (2011), 'Deciphering the hybridisation history leading to the Lager  
612 lineage based on the mosaic genomes of Saccharomyces bayanus strains NBRC1948  
613 and CBS380', *PLoS One*, 6 (10), e25821.
- 614 Novo, M., et al. (2009), 'Eukaryote-to-eukaryote gene transfer events revealed by the genome  
615 sequence of the wine yeast Saccharomyces cerevisiae EC1118', *Proc Natl Acad Sci U  
616 S A*, 106 (38), 16333-8.
- 617 Ozcan, S. and Johnston, M. (1999), 'Function and regulation of yeast hexose transporters',  
618 *Microbiol Mol Biol Rev*, 63 (3), 554-69.
- 619 Perez-Ortin, J. E., et al. (2002), 'Molecular characterization of a chromosomal rearrangement  
620 involved in the adaptive evolution of yeast strains', *Genome Res*, 12 (10), 1533-9.
- 621 Peter, J., et al. (2018a), 'Genome evolution across 1,011 Saccharomyces cerevisiae isolates',  
622 *Nature*.
- 623 --- (2018b), 'Genome evolution across 1,011 Saccharomyces cerevisiae isolates', *Nature*, 556  
624 (7701), 339-44.
- 625 Querol, A. and Bond, U. (2009), 'The complex and dynamic genomes of industrial yeasts',  
626 *FEMS Microbiol Lett*, 293 (1), 1-10.
- 627 Raney, B. J., et al. (2014), 'Track data hubs enable visualization of user-defined genome-wide  
628 annotations on the UCSC Genome Browser', *Bioinformatics*, 30 (7), 1003-5.
- 629 Rokas, A., et al. (2003), 'Genome-scale approaches to resolving incongruence in molecular  
630 phylogenies', *Nature*, 425 (6960), 798-804.
- 631 Salvado, Z., et al. (2011), 'Temperature adaptation markedly determines evolution within the  
632 genus Saccharomyces', *Appl Environ Microbiol*, 77 (7), 2292-302.

- 633 Scannell, D. R., et al. (2011), 'The Awesome Power of Yeast Evolutionary Genetics: New  
634 Genome Sequences and Strain Resources for the *Saccharomyces sensu stricto* Genus',  
635 *G3 (Bethesda)*, 1 (1), 11-25.
- 636 Seoighe, C., et al. (2000), 'Prevalence of small inversions in yeast gene order evolution', *Proc*  
637 *Natl Acad Sci U S A*, 97 (26), 14433-7.
- 638 Shibata, Y., et al. (2009), 'Yeast genome analysis identifies chromosomal translocation, gene  
639 conversion events and several sites of Ty element insertion', *Nucleic Acids Res*, 37  
640 (19), 6454-65.
- 641 Smit, A. F. A. , Hubley, R. , and Green, P. (2013-2015), '<Error! Hyperlink reference not  
642 valid., RepeatMasker Open-4.0.
- 643 Soares, E. V. (2011), 'Flocculation in *Saccharomyces cerevisiae*: a review', *J Appl Microbiol*,  
644 110 (1), 1-18.
- 645 Stanke, M. and Morgenstern, B. (2005), 'AUGUSTUS: a web server for gene prediction in  
646 eukaryotes that allows user-defined constraints', *Nucleic Acids Res*, 33 (Web Server  
647 issue), W465-7.
- 648 Strobe, P. K., et al. (2015), 'The 100-genomes strains, an *S. cerevisiae* resource that  
649 illuminates its natural phenotypic and genotypic variation and emergence as an  
650 opportunistic pathogen', *Genome Res*, 25 (5), 762-74.
- 651 Tsai, I. J., et al. (2008), 'Population genomics of the wild yeast *Saccharomyces paradoxus*:  
652 Quantifying the life cycle', *Proc Natl Acad Sci U S A*, 105 (12), 4957-62.
- 653 Usher, J. and Bond, U. (2009), 'Recombination between homoeologous chromosomes of  
654 lager yeasts leads to loss of function of the hybrid GPH1 gene', *Appl Environ*  
655 *Microbiol*, 75 (13), 4573-9.
- 656 Walther, A., Hesselbart, A., and Wendland, J. (2014), 'Genome sequence of *Saccharomyces*  
657 *carlsbergensis*, the world's first pure culture lager yeast', *G3 (Bethesda)*, 4 (5), 783-93.
- 658 Wang, S. A. and Bai, F. Y. (2008), '*Saccharomyces arboricolus* sp. nov., a yeast species from  
659 tree bark', *Int J Syst Evol Microbiol*, 58 (Pt 2), 510-4.
- 660 Warringer, J., et al. (2011), 'Trait variation in yeast is defined by population history', *PLoS*  
661 *Genet*, 7 (6), e1002111.
- 662 Wei, W., et al. (2007), 'Genome sequencing and comparative analysis of *Saccharomyces*  
663 *cerevisiae* strain YJM789', *Proc Natl Acad Sci U S A*, 104 (31), 12825-30.
- 664 Zhang, H., et al. (2010), '*Saccharomyces paradoxus* and *Saccharomyces cerevisiae* reside on  
665 oak trees in New Zealand: evidence for migration from Europe and interspecies  
666 hybrids', *FEMS Yeast Res*, 10 (7), 941-7.

667

## 668 **Figure Legends**

669 **Figure 1:** Dot plot alignments comparing the chromosome sequence identity of *S. jurei*  
670 NCYC 3947<sup>T</sup> versus *S. jurei* NCYC 3962 (A) and *S. cerevisiae* S288C versus *S. mikatae*  
671 IFO1815 (B). The broken lines represent chromosomal translocations between chromosomes  
672 VI / VII and XVI / VII.

673 **Figure 2:** Dot plot alignments comparing the chromosome sequence identity of *S. jurei*  
674 NCYC 3947<sup>T</sup> versus *S. cerevisiae* S288C (A) and *S. jurei* NCYC 3947<sup>T</sup> versus *S. mikatae*  
675 IFO1815 (B). Black ovals represent the translocation between chromosomes VI and VII,

676 which is common in *S. mikatae* and *S. jurei* whereas red ovals represent the translocation  
677 between chromosomes I and XIII, which is unique to *S. jurei*.

678 **Figure 3:** Heat map representing phenotypic fitness of *S. jurei* NCYC 3947<sup>T</sup> and NCYC  
679 3962 compared to *sensu stricto* species type strains in response to different environmental  
680 stressors at 30°C. Phenotypes are represented with colony sizes calculated as pixels and  
681 coloured according to the scale, with light yellow and dark blue colours representing the  
682 lowest and highest growth respectively. Hierarchical clustering of the strains is based on the  
683 overall growth profile under different media conditions tested.

684 **Figure 4:** Phylogenetic tree showing both novel strains located in one single monophyletic  
685 group, with the *S. mikatae*. Maximum likelihood phylogeny was constructed using a  
686 concatenated alignment of 101 universally distributed genes. Sequences from all  
687 *Saccharomyces sensu stricto* species were aligned using StatAlign v3.1 and phylogenetic tree  
688 was built using RaxML 8.1.3 with *N. castellii* kept as out-group.

689

## 690 **Table Legends**

691 **Table 1:** Strains used in this study.

692 **Table 2:** Summary of *S. jurei* NCYC 3947<sup>T</sup> genome sequencing and assembly using Hi-seq  
693 platform.

694 **Table 3:** Summary of *S. jurei* NCYC 3962 genome sequencing and assembly using Hi-seq  
695 platform.

696 **Table 4:** Summary of *S. jurei* NCYC 3947<sup>T</sup> and NCYC 3962 genome assembly using PacBio  
697 platform.

698 **Table 5:** Total number of chromosomes assembled in *S. jurei* NCYC 3947<sup>T</sup>.

699 **Table 6:** Total number of chromosomes assembled in *S. jurei* NCYC 3962.

700 **Table 7:** Counts of Ty elements in *S. cerevisiae*, *S. jurei* NCYC 3947<sup>T</sup> and NCYC 3962.

701 **Table 8:** SNPs count in *S. jurei* NCYC 3947<sup>T</sup> and NCYC 3962 genome.

702

703

704 **Supplementary Figure Legend**

705 **Figure S1:** Alignment of the amino acid sequences of *MEL1* belonging to *S. jurei* NCYC  
706 3947<sup>T</sup> (Sj) and *S. mikatae* IFO 1816 (Sm) (NCBI Accession number: Q11129.1 ) *MEL1*  
707 genes. Sequences were aligned using Clustal Omega. Asterisk (\*) indicate a position of  
708 conserved residue, a colon (:) indicate a position of strong conservation between the  
709 alignment, and a period (.) indicate a position of weak conservation between the alignment.

710

711 **Supplementary Table Legends**

712 **Table S1:** List of genes which are present in simple one to one orthologous relationship.

713 **Table S2:** List of genes which are present in many to many relationship.

714 **Table S3:** List of genes which are present in many to one relationship.

715 **Table S4:** List of genes which are present in one to many relationship.

716 **Table S5:** List of genes which are present in *S. cerevisiae* but absent in *S. jurei*.

717 **Table S6:** List of genes which are present in *S. jurei* but absent in *S. cerevisiae*.

718 **Table S7:** List of genes which are used to construct the phylogenetic tree.

719 **Table S8:** List of genes which are potentially introgressed in *S. jurei* genome from *S.*  
720 *paradoxus*.

721 **Table S9:** Lag phase time ( $\lambda$ ) of *Saccharomyces species* used in this study at different  
722 temperatures.

723 **Table S10:** Maximum growth rate ( $\mu_{max}$ ) of *Saccharomyces species* used in this study at  
724 different temperatures.

725 **Table S11:** Maximum biomass ( $A_{max}$ ) of *Saccharomyces species* used in this study at  
726 different temperatures.



**A)** *S. jurei* NCYC3947<sup>T</sup> vs *S. cerevisiae* S288C

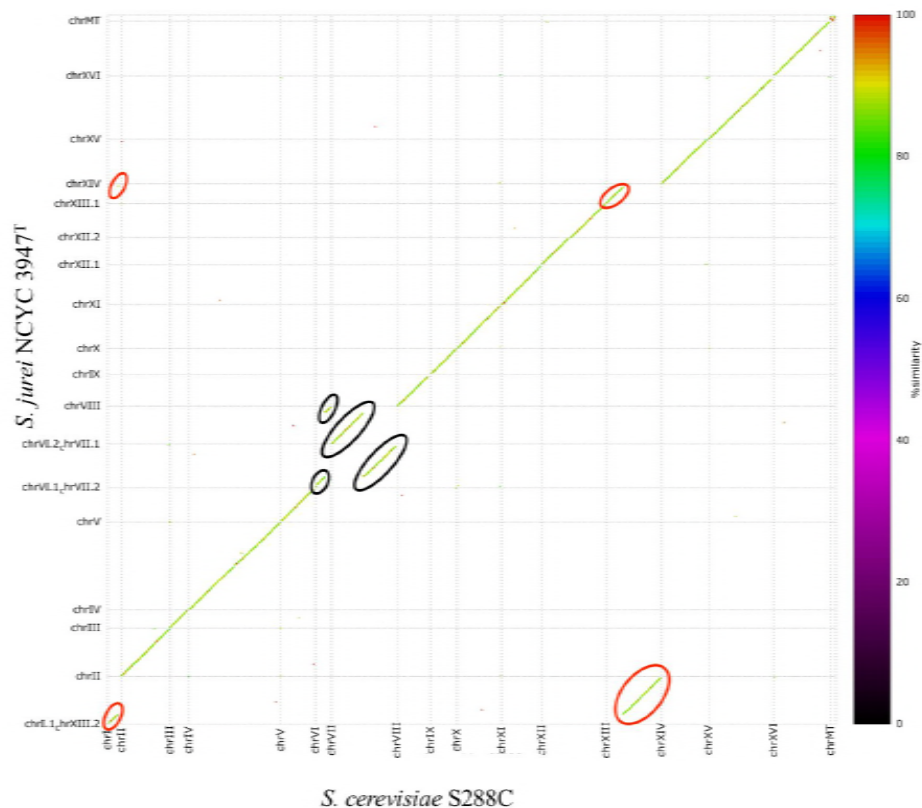

**B)** *S. jurei* NCYC 3947<sup>T</sup> vs *S. mikatae* IFO1815

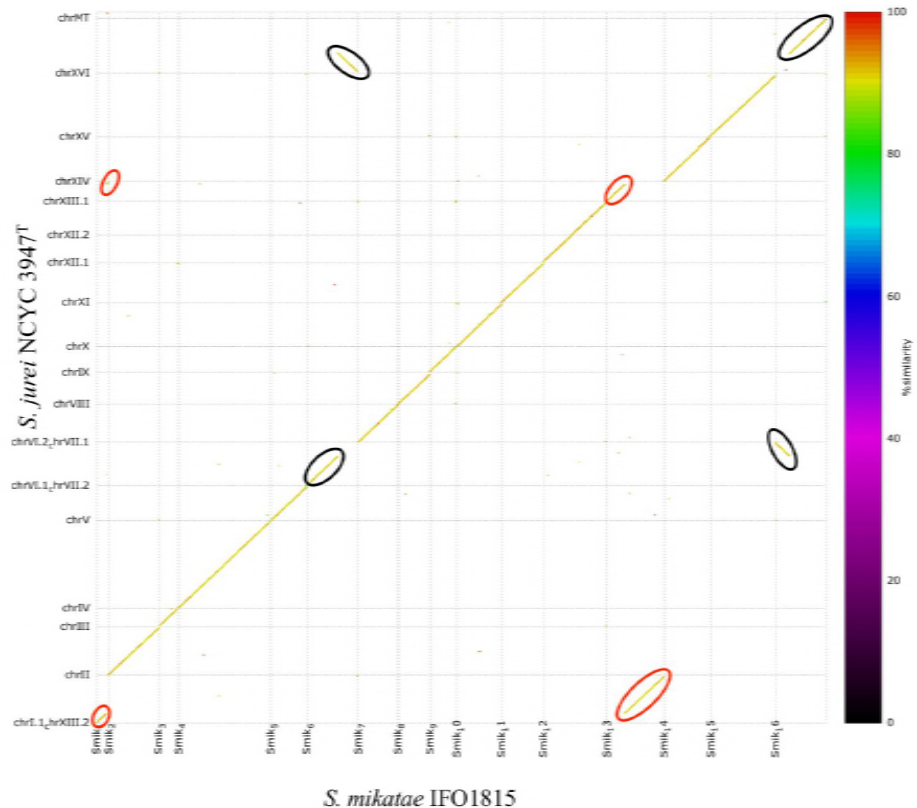

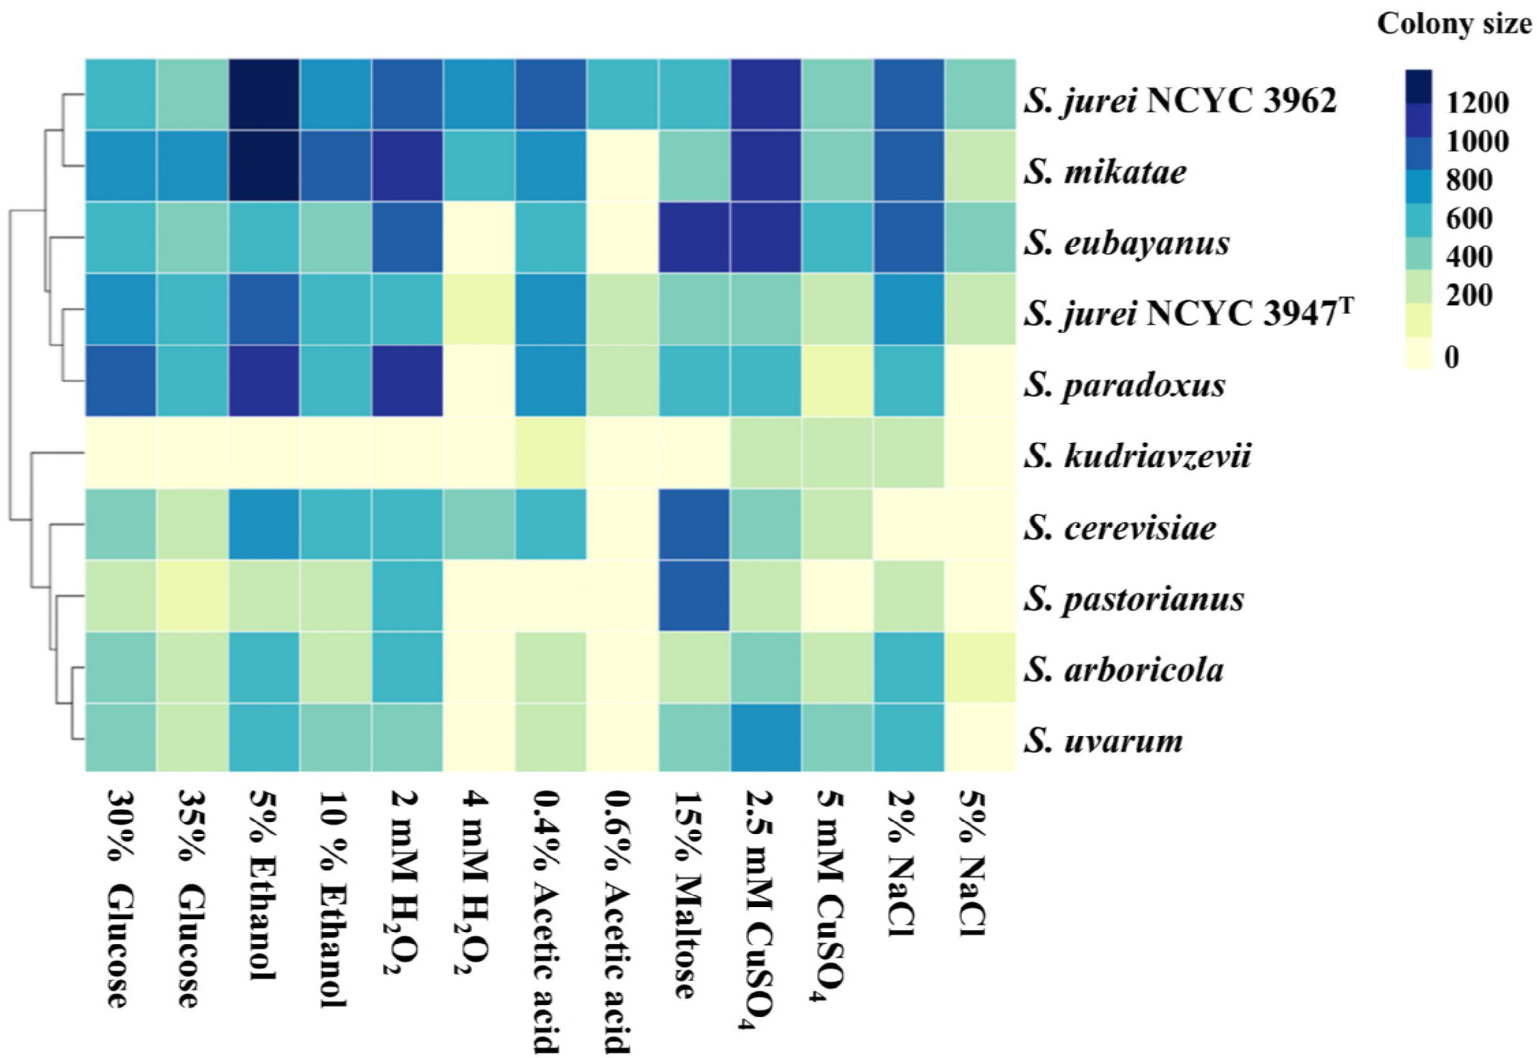



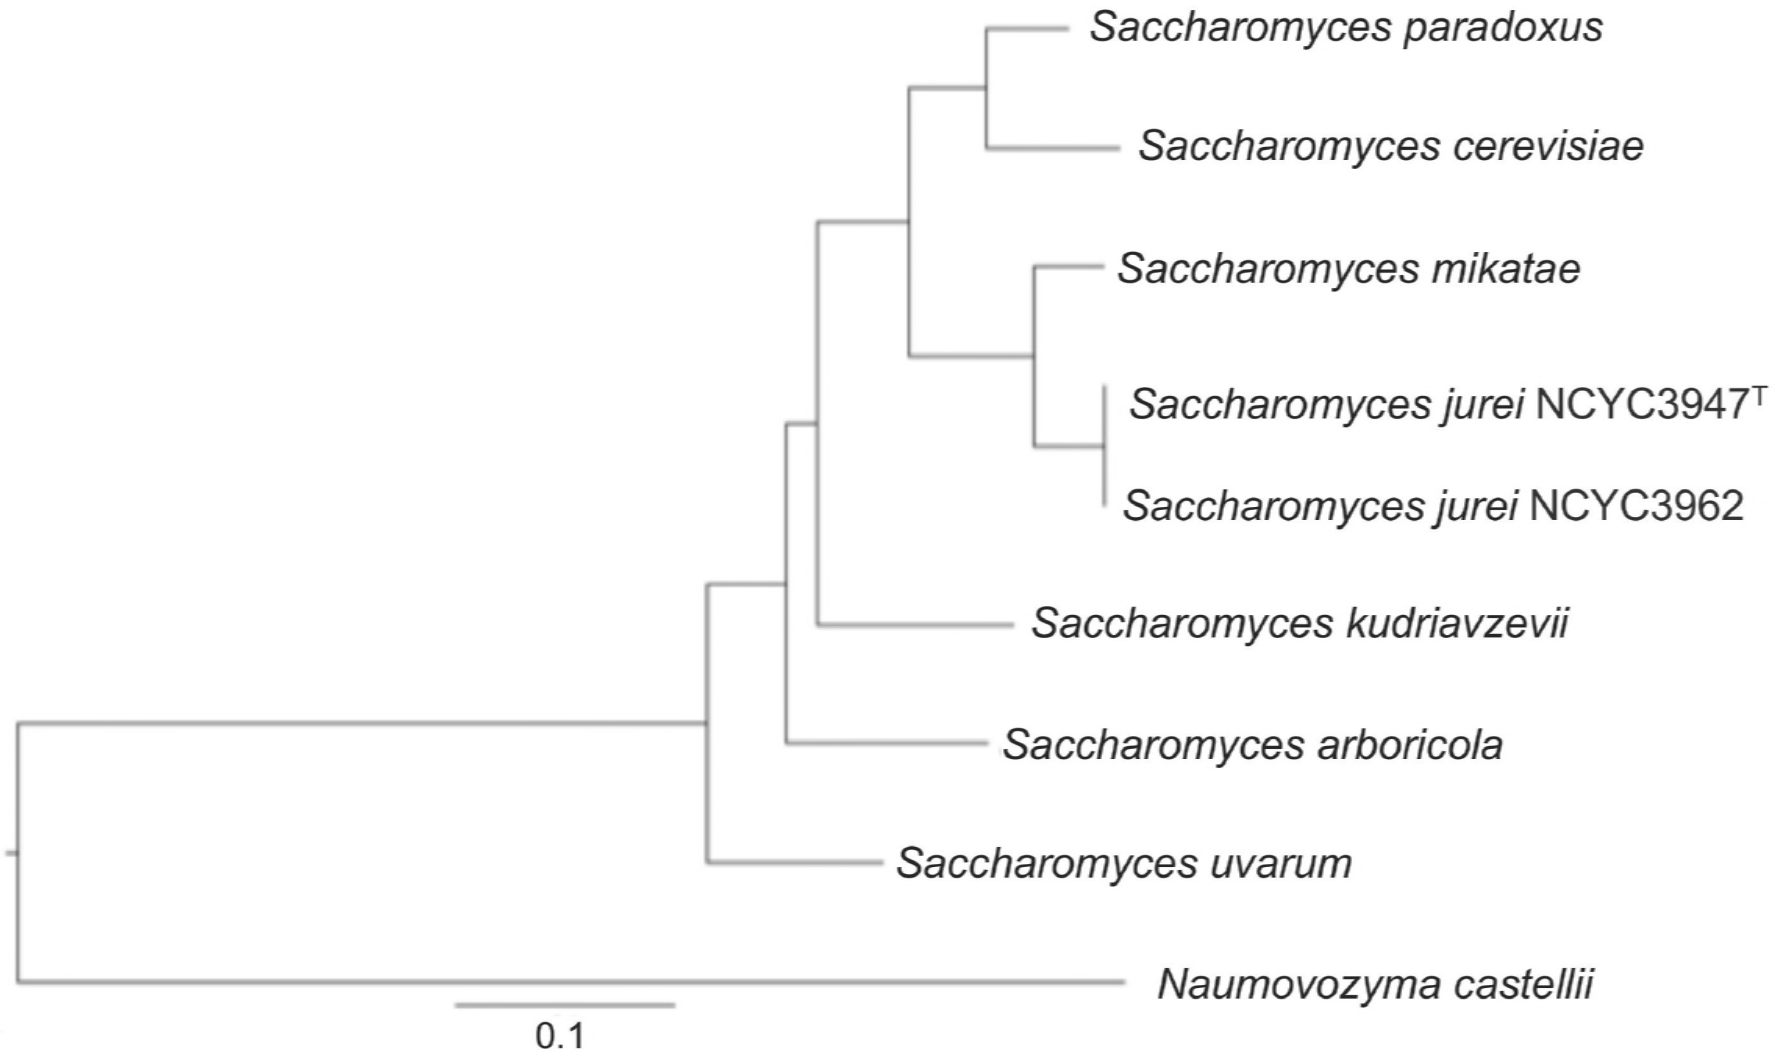

**Table 1: Strains used in this study.**

| <b>Species</b>         | <b>Strain number</b>                             | <b>References</b>                   |
|------------------------|--------------------------------------------------|-------------------------------------|
| <i>S. jurei</i>        | NCYC 3947 <sup>T</sup><br>NCYC 3962              | (Naseeb et al. 2017b)               |
| <i>S. cerevisiae</i>   | NCYC 505 <sup>T</sup>                            | (Vaughan Martini and Kurtzman 1985) |
| <i>S. paradoxus</i>    | CBS 432 <sup>T</sup>                             | (Kaneko and Banno 1991)             |
| <i>S. mikatae</i>      | NCYC 2888 <sup>T</sup> (IFO 1815 <sup>T</sup> )  | (Yamada et al. 1993)                |
| <i>S. kudriavzevii</i> | NCYC 2889 <sup>T</sup> (IFO 1802 <sup>T</sup> )  | (Yamada et al. 1993)                |
| <i>S. arboricola</i>   | CBS 10644 <sup>T</sup>                           | (Wang and Bai 2008)                 |
| <i>S. eubayanus</i>    | PYCC 6148 <sup>T</sup> (CBS 12357 <sup>T</sup> ) | (Libkind et al. 2011)               |
| <i>S. uvarum</i>       | NCYC 2669 (CBS 7001 <sup>T</sup> )               | (Pulvirenti et al. 2000)            |
| <i>S. pastorianus</i>  | NCYC 329 <sup>T</sup> (CBS 1538 <sup>T</sup> )   | (Martini and Martini 1987)          |

**Table 2: Summary of *S. jurei* NCYC 3947<sup>T</sup> genome sequencing and assembly using Hi-seq platform.**

| <b>Metric</b>  | <b>Contigs</b> | <b>Contigs &gt;= 500bp</b> | <b>Scaffolds</b> | <b>Scaffolds &gt;= 500bp</b> |
|----------------|----------------|----------------------------|------------------|------------------------------|
| Number         | 810            | 250                        | 753              | 211                          |
| Total Length   | 11,938,007     | 11,869,594                 | 11,940,421       | 11,869,594                   |
| Length Range   | 87-673,524     | 525-673,524                | 87-673,524       | 525-673,524                  |
| Average Length | 14,738         | 56,254                     | 15,857           | 56,254                       |
| N50            | 172,207        | 279,631                    | 279,631          | 279,631                      |

**Table 3: Summary of *S. jurei* NCYC 3962 genome sequencing and assembly using Hi-seq platform.**

| <b>Metric</b>  | <b>Contigs</b> | <b>Contigs &gt;= 500bp</b> | <b>Scaffolds</b> | <b>Scaffold &gt;= 500bp</b> |
|----------------|----------------|----------------------------|------------------|-----------------------------|
| Number         | 3719           | 987                        | 3618             | 933                         |
| Total length   | 11,760,925     | 11,419,281                 | 11,768,034       | 11,441,494                  |
| Length range   | 59-80,684      | 507-80,684                 | 59-80,684        | 507-80,684                  |
| Average length | 3,162          | 11,569                     | 3,252            | 12,263                      |
| N50            | 20,806         | 21,318                     | 21,928           | 22,552                      |

**Table 4: Summary of *S. jurei* NCYC 3947<sup>T</sup> and NCYC 3962 genome assembly using PacBio platform.**

| Metric              | <i>S. jurei</i> NCYC 3947 | <i>S. jurei</i> NCYC 3962 |
|---------------------|---------------------------|---------------------------|
| Contigs             | 35                        | 57                        |
| Max contig length   | 1,474,466                 | 1,470,125                 |
| Contig N50          | 738,741                   | 652,030                   |
| Total assembly size | 12,306,756                | 12,932,708                |

**Table 5: Total lengths of chromosomes assembled in *S. jurei* NCYC 3947<sup>T</sup>.**

| Sequence name    | Length (bp) including gaps |
|------------------|----------------------------|
| chrI.1_chrXIII.2 | 809,572                    |
| chrII            | 809,280                    |
| chrIII           | 308,350                    |
| chrIV            | 1,474,466                  |
| chrV             | 584,553                    |
| chrVI.1_chrVII.2 | 730,011                    |
| chrVI.2_chrVII.1 | 638,210                    |
| chrVIII          | 534,462                    |
| chrIX            | 434,517                    |
| chrX             | 738,741                    |
| chrXI            | 671,067                    |
| chrXII.1         | 458,950                    |
| chrXII.2         | 568,540                    |
| chrI.2_chrXIII.1 | 334,136                    |
| chrXIV           | 749,072                    |
| chrXV            | 1,068,672                  |
| chrXVI           | 920,427                    |
| chrMT            | 105,732                    |

**Table 6: Total lengths of chromosomes assembled in *S. jurei* NCYC 3962.**

| <b>Sequence name</b> | <b>Length (bp) including gaps</b> |
|----------------------|-----------------------------------|
| chrI.1_chrXIII.2     | 756,315                           |
| chrII                | 814,183                           |
| chrIII               | 329,028                           |
| chrIV                | 1,470,125                         |
| chrV                 | 570,437                           |
| chrVI.1_chrVII.2     | 723,619                           |
| chrVII.2_chrVI.1     | 652,030                           |
| chrVIII              | 536,516                           |
| chrIX                | 439,662                           |
| chrX.1               | 487,336                           |
| chrX.2               | 258,684                           |
| chrXI                | 676,065                           |
| chrXII.1             | 475,978                           |
| chrXII.2             | 571,082                           |
| chrI.2_chrXIII.1     | 334,998                           |
| chrXIV               | 790,124                           |
| chrXV.1              | 474,048                           |
| chrXV.2              | 240,703                           |
| chrXV.3              | 236,823                           |
| chrXV.4              | 114,889                           |
| chrXVI               | 806,586                           |
| chrMT                | 110,829                           |

**Table 7: Counts of Ty elements in *S. cerevisiae*, *S. jurei* NCYC 3947<sup>T</sup> and NCYC 3962.**

| Ty elements | Ty elements annotation                                                                                                    | Counts in <i>S. cerevisiae</i> | Counts in <i>S. jurei</i> NCYC 3947 <sup>T</sup> | Counts in <i>S. jurei</i> NCYC 3962 |
|-------------|---------------------------------------------------------------------------------------------------------------------------|--------------------------------|--------------------------------------------------|-------------------------------------|
| Ty          | Yeast Ty transposable element Ty-pY109 near tRNA-Lys1 gene                                                                | 164                            | 71                                               | 74                                  |
| Ty1-LTR     | Ty1 LTR-retrotransposon from yeast (LTR)                                                                                  | 124                            | 276                                              | 272                                 |
| Ty2-LTR     | Ty2 LTR-retrotransposon from yeast (LTR)                                                                                  | 108                            | 118                                              | 117                                 |
| Ty2-I-int   | Ty2 LTR-retrotransposon from yeast (internal portion).                                                                    | 15                             | 2                                                | 2                                   |
| Ty3-LTR     | <i>S. paradoxus</i> Ty3-like retrotransposon, Long terminal repeat                                                        | 61                             | 70                                               | 71                                  |
| Ty3-I       | <i>S. paradoxus</i> Ty3-like retrotransposon, Internal region.                                                            | 2                              | 1                                                | 1                                   |
| Ty4         | Gag homolog, Ty4B=protease, integrase, reverse transcriptase, and RNase H domain containing protein {retrotransposon Ty4} | 51                             | 164                                              | 162                                 |

**Table 8: Approximate numbers of SNPs in *S. jurei* NCYC 3947<sup>T</sup> and NCYC 3962 genome.**

| Reference genome       | Genome mapped          | SNPs |
|------------------------|------------------------|------|
| NCYC 3947 <sup>T</sup> | NCYC 3947 <sup>T</sup> | 278  |
| NCYC 3962              | NCYC 3962              | 245  |
| NCYC 3947 <sup>T</sup> | NCYC 3962              | 5702 |
| NCYC 3962              | NCYC 3947 <sup>T</sup> | 6227 |
